# Supplementary material
Source: PubMed Central journal article supplement (PMC5487653)
Supplement: AAC.00536-17_zac007176295s1.pdf [file AAC.00536-17_zac007176295s1.pdf]

Table S1 Information on *gshB*-bearing plasmids

| Plasmid                 | Accession No | Size (bp) | Country | Species                          | Specimen          | Incompatibility type | Multi-IS locus of <i>gshB</i>        |
|-------------------------|--------------|-----------|---------|----------------------------------|-------------------|----------------------|--------------------------------------|
| pYD786-4*               | KU254581.1   | 25,678    | U.S.    | <i>E. coli</i>                   | urine             | IncX2                | IS26-ΔIS1294- <i>gshB</i> -ΔISSba14  |
| pSJ_255                 | CP011062.1   | 255,368   | China   | <i>E. coli</i>                   | pheasant duodenum | IncHI2, IncN         | IS26-ΔIS1294- <i>gshB</i> -ΔISSba14  |
| pSLK172-1**             | CP017632.1   | 369,298   | China   | <i>E. coli</i>                   | human feces       | IncHI2, IncN, IncY   | IS26-ΔIS1294- <i>gshB</i> -ΔISSba14  |
| pHNFP460-1**            | KJ020575.1   | 99,868    | China   | <i>E. coli</i>                   | pig feces         | IncN, IncFII         | IS26-ΔIS1294- <i>gshB</i> -ΔISSba14  |
| pE80**                  | KU321583.1   | 138,718   | China   | <i>E. coli</i>                   | chicken meat      | IncFII, IncN         | IS26-ΔIS1294- <i>gshB</i> -ΔISSba14  |
| pHSHLJ1-MCR1            | KX856066.1   | 238,539   | China   | <i>Salmonella</i><br>Typhimurium | human feces       | IncHI2, IncN         | IS26-ΔIS1294- <i>gshB</i> -ΔISSba14  |
| pMCR_WCHEC16<br>13**    | CP019214.1   | 289,255   | China   | <i>E. coli</i>                   | sewage            | IncHI2, IncN         | IS26-ΔIS1294- <i>gshB</i> -ΔISSba14  |
| PCN061p6                | CP006642.1   | 145,722   | China   | <i>E. coli</i>                   | lung of a pig     | IncX1, IncN, IncFIB  | IS26-ΔIS1294- <i>gshB</i> -ΔISSba14  |
| plasmid B (EC D9)       | CP010154.1   | 78,557    | China   | <i>E. coli</i>                   | dog               | IncY                 | IS26-ΔIS1294- <i>gshB</i> -ΔISSba14  |
| EC D4 chromosome        | CP010143.1   | 4,821,305 | China   | <i>E. coli</i>                   | dog               | IncX1, IncY          | IS26-ΔIS1294- <i>gshB</i> -ΔISSba14  |
| pSLK172-2**             | CP017633.1   | 120,528   | China   | <i>E. coli</i>                   | human feces       | IncX1, IncN, IncFII  | ΔIS26-ΔIS1294- <i>gshB</i> -ΔISSba14 |
| plasmid B** (EC<br>S30) | CP010233.1   | 136,060   | China   | <i>E. coli</i>                   | forest soil       | IncI1                | IS26-Δorf- <i>gshB</i> -ΔISSba14     |
| pMR0516mcr*             | KX276657.1   | 225,069   | U.S.    | <i>E. coli</i>                   | urine             | IncF                 | IS26-Δ <i>gshB</i> -ΔISSba14         |
| pC629**                 | CP015725.1   | 210,106   | China   | <i>Salmonella</i><br>Indiana     | chicken carcass   | IncHI2, IncN         | IS26-Δ <i>gshB</i> -ΔISSba14         |

\* plasmids coexisting with *fosA6* or *fosA3*\*\* plasmids carrying *fosA3*

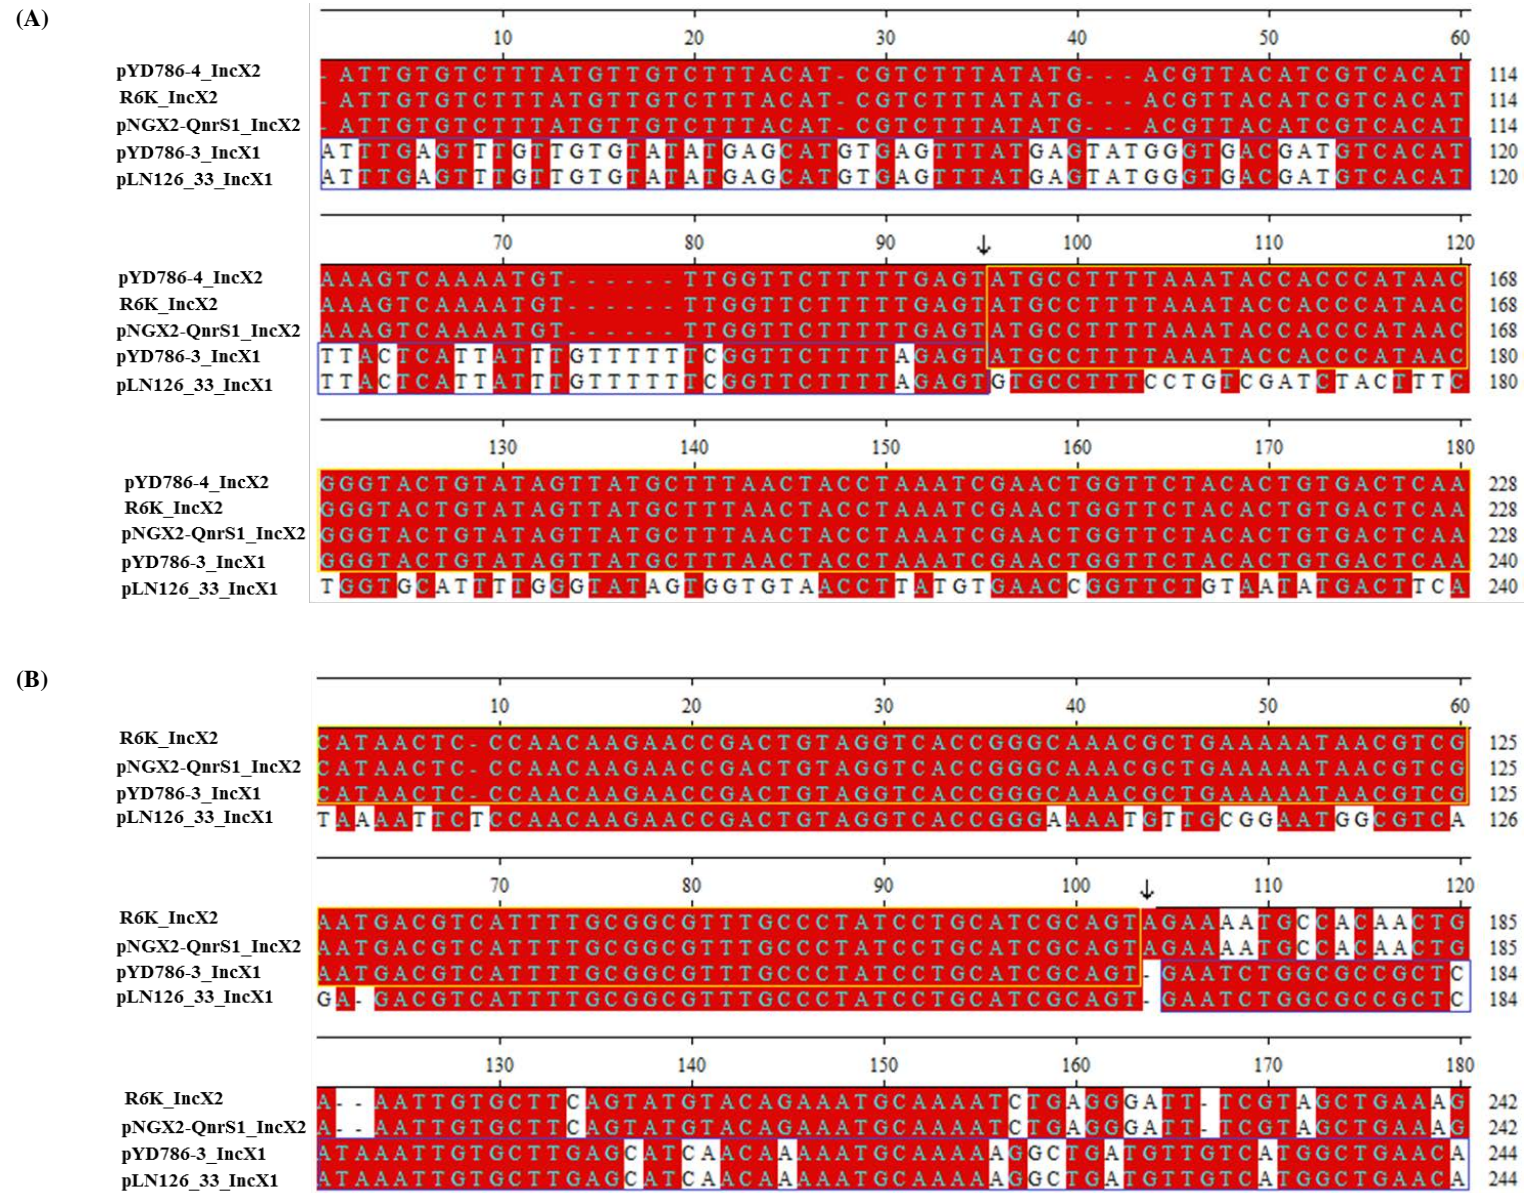

**Figure S1.** Sequence alignments of representative IncX1 and IncX2 plasmids surrounding recombination breakpoints (A) Sequences between *parA* and *tnpR*<sub>R6K</sub>. R6K, nt 7567-7735; pLN126\_33, nt 30181-30002. (B) Sequences in  $\alpha$ -LIR. R6K, nt 329-425; pLN126\_33, nt 6009-5833. Putative recombination junction sites are denoted by black arrows at position 30121 and 21749 of pYD786-3.

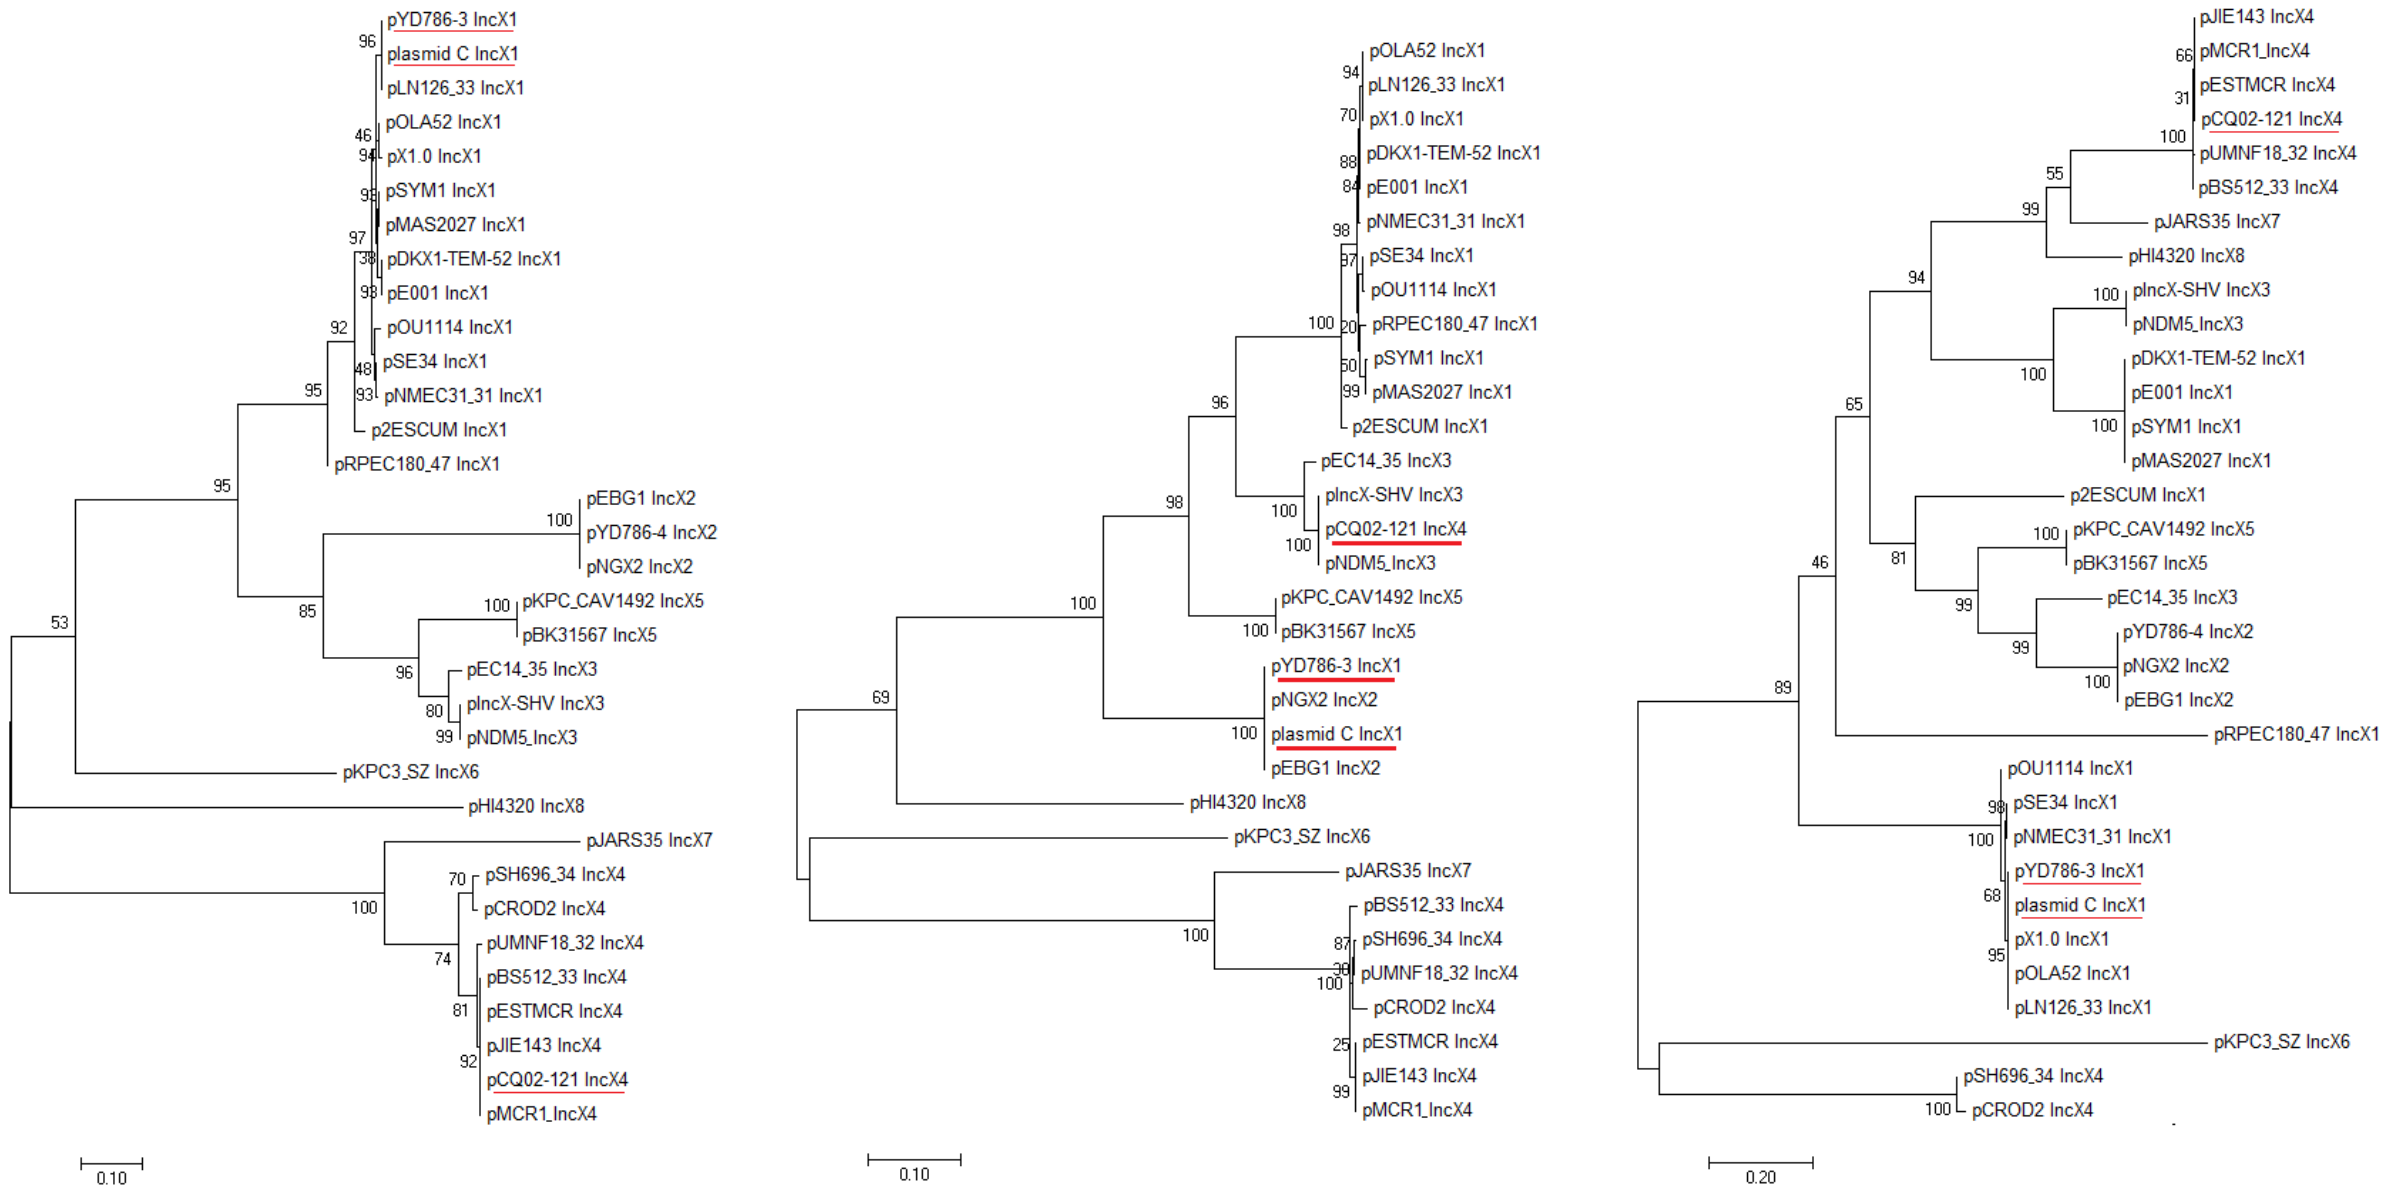

(A) *bis* of IncX

(B) *taxC* of IncX

(C) *pir* of IncX

**Figure S2.** Phylogenetic relationships of three conserved backbone genes from IncX plasmids, (A) *bis* of IncX. (B) *taxC* of IncX. (C) *pir* of IncX. Maximum-likelihood trees are constructed using Mega7. Hybrid plasmids are indicated using red underlines.
